# Supplementary material for: Correlation between metabolomic profile constituents and feline pancreatic lipase immunoreactivity
Source: PubMed Central journal article supplement — J Vet Intern Med. 2022 Jan 13;36(2):473–81. doi: 10.1111/jvim.16349 (PMC8965226; doi:10.1111/jvim.16349), 2022-01-13
Supplement: JVIM-36-473-s001.pdf [file JVIM-36-473-s001.pdf]

**Table S4. Concentration of 407 metabolites [ $\mu\text{mol/L}$ ] in cats. Metabolites significant at  $\alpha=0.05$  in uncorrected analysis are highlighted in red**

| Metabolites                              | Median<br>(interquartile range) | Range       | Correlation with fPLI<br>( $R_s$ ) | p-value without Bonferroni<br>correction |
|------------------------------------------|---------------------------------|-------------|------------------------------------|------------------------------------------|
| <b>AMINO ACIDS AND RELATED COMPOUNDS</b> |                                 |             |                                    |                                          |
| <b>Proteinogenic amino acids</b>         |                                 |             |                                    |                                          |
| Alanine                                  | 372 (302 – 466)                 | 157 – 791   | -0.201                             | 0.167                                    |
| Arginine                                 | 92.8 (75.5 – 124)               | 10.5 – 179  | -0.288                             | 0.045                                    |
| Asparagine                               | 44.9 (33.2 – 66.1)              | 15.4 – 101  | -0.008                             | 0.956                                    |
| Aspartic Acid                            | 25.6 (18 – 40.8)                | 6.27 – 104  | 0.261                              | 0.070                                    |
| Cysteine                                 | 27.6 (24.3 – 31.9)              | 17.2 – 88.5 | -0.223                             | 0.123                                    |
| Glutamine                                | 678 (565 – 835)                 | 259 – 2262  | -0.121                             | 0.406                                    |
| Glutamic Acid                            | 128 (97.5 – 177)                | 28.3 – 1031 | 0.050                              | 0.732                                    |
| Glycine                                  | 322 (239 – 371)                 | 122 – 940   | -0.029                             | 0.843                                    |
| Histidine                                | 113 (93.3 – 142)                | 64.5 – 571  | -0.079                             | 0.590                                    |
| Isoleucine                               | 94.7 (65.9 – 126)               | 36.3 – 390  | 0.142                              | 0.331                                    |
| Leucine                                  | 169 (113 – 211)                 | 52.6 – 673  | 0.046                              | 0.754                                    |
| Lysine                                   | 140 (114 – 169)                 | 55.8 – 267  | 0.159                              | 0.275                                    |

|                                      |                      |              |        |        |
|--------------------------------------|----------------------|--------------|--------|--------|
| Methionine                           | 42.3 (30.6 – 65.1)   | 13.7 – 192   | -0.103 | 0.483  |
| Phenylalanine                        | 78.5 (65.3 – 93.4)   | 44.5 – 183   | 0.081  | 0.579  |
| Proline                              | 156 (127 – 225)      | 69.8 – 491   | -0.229 | 0.114  |
| Serine                               | 157 (115 – 200)      | 68.4 – 367   | -0.140 | 0.338  |
| Threonine                            | 150 (117 – 179)      | 49.9 – 475   | 0.101  | 0.492  |
| Tryptophan                           | 52.4 (40.1 – 60.8)   | 12.6 – 92.5  | -0.492 | <0.001 |
| Tyrosine                             | 48.1 (37.3 – 54.9)   | 16.6 – 147   | 0.022  | 0.881  |
| Valine                               | 203 (151 – 262)      | 63.3 – 718   | 0.093  | 0.524  |
| <b>Non-proteinogenic amino acids</b> |                      |              |        |        |
| beta-Alanine                         | 2.5 (1.58 – 6.15)    | 0.881 – 29.6 | 0.039  | 0.790  |
| Citrulline                           | 12.7 (8.82 – 18.3)   | 3.03 – 28.4  | 0.165  | 0.257  |
| Ornithine                            | 19.5 (15.8 – 31.6)   | 9.51 – 125   | 0.343  | 0.016  |
| Cystine                              | 0.303 (0.169 – 0.69) | 0.067 – 124  | 0.252  | 0.081  |
| $\alpha$ -Amino-butyric acid         | 14.3 (9.53 – 20.2)   | 3.09 – 42.8  | 0.325  | 0.023  |
| $\gamma$ -Amino-butyric acid         | 0.477 (0.253 – 0.83) | 0.07 – 2.52  | -0.192 | 0.186  |
| Homoarginine                         | 0.751 (0.532 – 1.09) | 0.072 – 4.54 | -0.147 | 0.313  |
| Homocysteine                         | 5.96 (4.65 – 8.06)   | 2.60 – 21.1  | -0.100 | 0.496  |

|                                    |                      |              |        |       |
|------------------------------------|----------------------|--------------|--------|-------|
| Taurine                            | 155 (98.4 – 186)     | 28.0 – 314   | -0.072 | 0.624 |
| trans-4-Hydroxyproline             | 32.3 (19.9 – 53.2)   | 4.96 – 98.4  | -0.060 | 0.682 |
| Methionine sulfoxide               | 6.88 (4.05 – 9.89)   | 1.76 – 30.9  | -0.122 | 0.402 |
| <b>Amino acid derivatives</b>      |                      |              |        |       |
| 1-Methylhistidine                  | 15.6 (9.42 – 29.1)   | 4.69 – 99.1  | 0.389  | 0.006 |
| 3-Methylhistidine                  | 15.0 (9.07 – 28.1)   | 3.44 – 109   | 0.307  | 0.032 |
| 5-Aminovaleric acid                | 1.28 (0.606 – 2.49)  | 0.058 – 14.1 | 0.296  | 0.039 |
| Asymmetric dimethylarginine (ADMA) | 1.92 (1.8 – 2.59)    | 1.15 – 6.39  | 0.247  | 0.088 |
| Symmetric dimethylarginine (SDMA)  | 0.516 (0.356 – 0.64) | 0.235 – 2.99 | 0.379  | 0.007 |
| $\alpha$ -Aminoadipic acid         | 2.42 (1.61 – 2.91)   | 1.13 – 12.4  | 0.360  | 0.011 |
| Glycine betaine                    | 171 (103 – 302)      | 35 – 1585    | 0.284  | 0.048 |
| Proline betaine                    | 0.535 (0.261 – 0.98) | 0.091 – 5.30 | 0.378  | 0.007 |
| Carnosine                          | 34.8 (27.2 – 42.5)   | 2.01 – 110   | 0.080  | 0.586 |
| L-Anserine                         | 4.95 (3.48 – 7.52)   | 0.904 – 21.2 | -0.011 | 0.941 |
| Sarcosine                          | 11.0 (5.79 – 21)     | 2.31 – 52.1  | -0.236 | 0.102 |
| Creatinine                         | 104 (85.8 – 145)     | 42.9 – 909   | 0.344  | 0.016 |
| Kynurenine                         | 5.90 (4.70 – 8.98)   | 3.13 – 28.9  | 0.116  | 0.427 |

|                           |                      |              |        |       |
|---------------------------|----------------------|--------------|--------|-------|
| Phenylacetyl-glycine      | 3.61 (2.09 – 10.2)   | 0.666 – 39.5 | 0.367  | 0.010 |
| <b>Biogenic amines</b>    |                      |              |        |       |
| Putrescine                | 1.10 (0.879 – 1.72)  | 0.442 – 5.50 | 0.278  | 0.053 |
| Serotonin                 | 8.82 (0.745 – 16.0)  | 0.116 – 31.2 | -0.074 | 0.616 |
| Spermidine                | 0.456 (0.381 – 0.61) | 0.263 – 1.14 | -0.044 | 0.765 |
| <b>Indole derivatives</b> |                      |              |        |       |
| Indoleacetic acid         | 1.45 (0.859 – 2.26)  | 0.209 – 21.4 | 0.175  | 0.228 |
| Indoxyl sulfate           | 7.70 (3.36 – 16.8)   | 0.398 – 120  | 0.392  | 0.005 |
| <b>Cresol</b>             |                      |              |        |       |
| p-Cresol sulfate          | 29.6 (8.26 – 60.4)   | 0.042 – 140  | 0.321  | 0.025 |
| <b>CARBOHYDRATES</b>      |                      |              |        |       |
| Hexoses                   | 5717 (4099 – 15516)  | 1035 – 28138 | 0.367  | 0.010 |
| <b>LIPIDS</b>             |                      |              |        |       |
| <b>Acylcarnitines</b>     |                      |              |        |       |
| C0                        | 31.0 (18.3 – 48.7)   | 7.45 – 314   | 0.130  | 0.374 |

|                           |                       |               |        |       |
|---------------------------|-----------------------|---------------|--------|-------|
| C2                        | 3.37 (1.83 – 7.16)    | 0.663 – 49.4  | 0.378  | 0.007 |
| C4                        | 0.084 (0.058 – 0.150) | 0.036 – 0.760 | 0.454  | 0.001 |
| C5                        | 0.132 (0.095 – 0.210) | 0.035 – 1.01  | 0.345  | 0.015 |
| C18                       | 0.193 (0.112 – 0.350) | 0.056 – 1.11  | 0.424  | 0.002 |
| C18:2                     | 0.096 (0.052 – 0.140) | 0.027 – 0.420 | 0.298  | 0.038 |
| <b>Fatty acids</b>        |                       |               |        |       |
| Arachidonic acid          | 15.2 (8.32 – 19.2)    | 1.46 – 37.6   | 0.056  | 0.703 |
| Docosahexaenoic acid      | 14.8 (6.29 – 19.5)    | 1.82 – 59.6   | 0.275  | 0.056 |
| Octadecenoic acid         | 188 (147 – 247)       | 71.6 – 499    | 0.134  | 0.360 |
| Octadecadienoate          | 277 (184 – 355)       | 83.8 – 705    | 0.069  | 0.636 |
| Eicosenoic acid           | 7.3 (4.24 – 14.5)     | 2.54 – 28.8   | 0.236  | 0.102 |
| Eicosadienoic acid        | 4.5 (2.68 – 6.88)     | 1.64 – 19.8   | 0.171  | 0.241 |
| <b>Cholesterol esters</b> |                       |               |        |       |
| CE(14:0)                  | 3.31 (2.15 – 4.16)    | 0.875 – 9.74  | -0.230 | 0.111 |
| CE(16:0)                  | 150 (120 – 193)       | 66.6 – 276    | 0.192  | 0.185 |
| CE(16:1)                  | 27.2 (21.6 – 35.7)    | 10.2 – 75.7   | 0.024  | 0.869 |
| CE(17:0)                  | 4.31 (3.47 – 6.16)    | 1.84 – 15.2   | 0.070  | 0.631 |

|                   |                       |               |        |       |
|-------------------|-----------------------|---------------|--------|-------|
| CE(17:1)          | 4.39 (3.21 – 5.26)    | 0.935 – 21.2  | 0.056  | 0.703 |
| CE(18:0)          | 21.5 (18.9 – 31.9)    | 12.7 – 57.1   | 0.309  | 0.031 |
| CE(18:1)          | 366 (285 – 543)       | 182 – 994     | 0.387  | 0.006 |
| CE(18:2)          | 1732 (1366 – 2332)    | 711 – 3440    | 0.193  | 0.184 |
| CE(18:3)          | 36.1 (28 – 57.4)      | 10.6 – 136    | 0.035  | 0.813 |
| CE(20:3)          | 19.2 (15.6 – 26.9)    | 10.2 – 62.5   | 0.182  | 0.210 |
| CE(20:4)          | 473 (281 – 628)       | 163 – 1419    | 0.184  | 0.206 |
| CE(20:5)          | 97.2 (37.0 – 147)     | 8.43 – 587    | -0.094 | 0.522 |
| CE(22:2)          | 0.684 (0.488 – 1.22)  | 0.201 – 9.72  | 0.111  | 0.447 |
| CE(22:5)          | 7.92 (4.25 – 10.8)    | 1.83 – 20.2   | 0.285  | 0.047 |
| CE(22:6)          | 101 (52.4 – 202)      | 13.9 – 410    | 0.265  | 0.066 |
| <b>Bile acids</b> |                       |               |        |       |
| TCA               | 1.50 (0.575 – 3.40)   | 0.035 – 127   | 0.218  | 0.132 |
| <b>Ceramides</b>  |                       |               |        |       |
| Cer(d16:1/18:0)   | 0.092 (0.065 – 0.120) | 0.029 – 0.270 | 0.365  | 0.010 |
| Cer(d16:1/20:0)   | 0.047 (0.037 – 0.060) | 0.023 – 0.120 | 0.172  | 0.237 |
| Cer(d16:1/22:0)   | 0.069 (0.051 – 0.090) | 0.015 – 0.160 | -0.038 | 0.797 |

|                     |                       |               |        |       |
|---------------------|-----------------------|---------------|--------|-------|
| Cer(d16:1/23:0)     | 0.051 (0.035 – 0.070) | 0.006 – 0.19  | -0.220 | 0.129 |
| Cer(d18:1/16:0)     | 0.384 (0.281 – 0.550) | 0.169 – 1.25  | 0.414  | 0.003 |
| Cer(d18:1/18:0)     | 0.323 (0.241 – 0.570) | 0.127 – 3.02  | 0.466  | 0.001 |
| Cer(d18:1/20:0(OH)) | 0.895 (0.655 – 1.36)  | 0.338 – 3.77  | 0.410  | 0.003 |
| Cer(d18:1/20:0)     | 0.139 (0.089 – 0.200) | 0.047 – 0.750 | 0.290  | 0.043 |
| Cer(d18:1/22:0)     | 0.386 (0.242 – 0.540) | 0.123 – 1.68  | 0.277  | 0.054 |
| Cer(d18:1/23:0)     | 0.62 (0.411 – 0.91)   | 0.196 – 1.80  | 0.257  | 0.074 |
| Cer(d18:1/24:0)     | 0.824 (0.51 – 1.19)   | 0.294 – 1.55  | 0.281  | 0.050 |
| Cer(d18:1/24:1)     | 0.686 (0.409 – 1.29)  | 0.284 – 2.92  | 0.443  | 0.001 |
| Cer(d18:1/25:0)     | 0.326 (0.231 – 0.44)  | 0.089 – 1.03  | 0.249  | 0.084 |
| Cer(d18:1/26:1)     | 0.035 (0.024 – 0.060) | 0.012 – 0.130 | 0.374  | 0.008 |
| Cer(d18:2/16:0)     | 0.036 (0.027 – 0.050) | 0.017 – 0.070 | 0.213  | 0.142 |
| Cer(d18:2/18:0)     | 0.051 (0.040 – 0.070) | 0.020 – 0.120 | 0.352  | 0.013 |
| Cer(d18:2/20:0)     | 0.034 (0.027 – 0.040) | 0.014 – 0.060 | 0.196  | 0.177 |
| Cer(d18:2/22:0)     | 0.044 (0.033 – 0.060) | 0.014 – 0.100 | 0.061  | 0.675 |
| Cer(d18:2/23:0)     | 0.031 (0.023 – 0.040) | 0.010 – 0.070 | -0.086 | 0.559 |
| Cer(d18:2/24:0)     | 0.054 (0.047 – 0.070) | 0.023 – 0.100 | -0.114 | 0.435 |

|                                            |                       |               |       |        |
|--------------------------------------------|-----------------------|---------------|-------|--------|
| Cer(d18:2/24:1)                            | 0.063 (0.050 – 0.090) | 0.026 – 0.160 | 0.341 | 0.017  |
| <b>Cerebrosides (monohexosylceramides)</b> |                       |               |       |        |
| HexCer(d16:1/22:0)                         | 0.032 (0.022 – 0.04)  | 0.010 – 0.060 | 0.000 | 0.999  |
| HexCer(d16:1/24:0)                         | 0.025 (0.021 – 0.03)  | 0.012 – 0.040 | 0.324 | 0.023  |
| HexCer(d18:1/16:0)                         | 0.998 (0.774 – 1.96)  | 0.372 – 4.60  | 0.510 | <0.001 |
| HexCer(d18:1/18:0)                         | 0.428 (0.301 – 0.890) | 0.150 – 2.49  | 0.526 | <0.001 |
| HexCer(d18:1/18:1)                         | 0.095 (0.076 – 0.140) | 0.045 – 0.400 | 0.422 | 0.003  |
| HexCer(d18:1/20:0)                         | 0.300 (0.254 – 0.510) | 0.126 – 1.41  | 0.536 | <0.001 |
| HexCer(d18:1/22:0)                         | 0.66 (0.495 – 1.05)   | 0.236 – 2.73  | 0.477 | 0.001  |
| HexCer(d18:1/23:0)                         | 0.47 (0.342 – 0.740)  | 0.174 – 1.73  | 0.496 | <0.001 |
| HexCer(d18:1/24:0)                         | 0.428 (0.308 – 0.610) | 0.192 – 1.28  | 0.556 | <0.001 |
| HexCer(d18:1/24:1)                         | 1.21 (0.989 – 1.80)   | 0.593 – 5.31  | 0.580 | <0.001 |
| HexCer(d18:1/26:0)                         | 0.115 (0.095 – 0.150) | 0.050 – 0.330 | 0.389 | 0.006  |
| HexCer(d18:1/26:1)                         | 0.099 (0.081 – 0.120) | 0.053 – 0.200 | 0.316 | 0.027  |
| HexCer(d18:2/20:0)                         | 0.066 (0.052 – 0.080) | 0.024 – 0.130 | 0.237 | 0.101  |
| HexCer(d18:2/22:0)                         | 0.109 (0.074 – 0.160) | 0.050 – 0.230 | 0.208 | 0.151  |
| HexCer(d18:2/23:0)                         | 0.091 (0.070 – 0.130) | 0.034 – 0.240 | 0.339 | 0.017  |

|                            |                       |               |       |        |
|----------------------------|-----------------------|---------------|-------|--------|
| HexCer(d18:2/24:0)         | 0.280 (0.206 – 0.330) | 0.082 – 0.500 | 0.175 | 0.230  |
| <b>Dihexosylceramides</b>  |                       |               |       |        |
| Hex2Cer(d18:1/16:0)        | 0.412 (0.331 – 0.550) | 0.169 – 1.04  | 0.482 | <0.001 |
| Hex2Cer(d18:1/18:0)        | 0.215 (0.164 – 0.250) | 0.080 – 0.570 | 0.388 | 0.006  |
| Hex2Cer(d18:1/20:0)        | 0.080 (0.064 – 0.090) | 0.028 – 0.160 | 0.508 | <0.001 |
| Hex2Cer(d18:1/22:0)        | 0.062 (0.053 – 0.080) | 0.023 – 0.350 | 0.398 | 0.005  |
| Hex2Cer(d18:1/24:0)        | 0.043 (0.033 – 0.050) | 0.020 – 0.090 | 0.250 | 0.083  |
| Hex2Cer(d18:1/24:1)        | 0.068 (0.052 – 0.090) | 0.034 – 0.160 | 0.520 | <0.001 |
| <b>Trihexosylceramides</b> |                       |               |       |        |
| Hex3Cer(d18:1/16:0)        | 0.642 (0.517 – 0.850) | 0.289 – 1.27  | 0.369 | 0.009  |
| Hex3Cer(d18:1/18:0)        | 0.129 (0.102 – 0.170) | 0.047 – 0.300 | 0.307 | 0.032  |
| Hex3Cer(d18:1/20:0)        | 0.103 (0.084 – 0.130) | 0.039 – 0.190 | 0.288 | 0.045  |
| Hex3Cer(d18:1/22:0)        | 0.125 (0.087 – 0.160) | 0.048 – 0.250 | 0.244 | 0.091  |
| Hex3Cer(d18:1/24:1)        | 0.120 (0.094 – 0.140) | 0.058 – 0.440 | 0.455 | 0.001  |
| Hex3Cer(d18:1/26:1)        | 0.330 (0.259 – 0.490) | 0.167 – 1.21  | 0.307 | 0.032  |
| <b>Sphingomyelins</b>      |                       |               |       |        |
| SM (OH) C14:1              | 16.0 (12.5 – 19.3)    | 6.41 – 57.4   | 0.042 | 0.773  |

|                                                           |                       |               |        |        |
|-----------------------------------------------------------|-----------------------|---------------|--------|--------|
| SM (OH) C16:1                                             | 5.91 (4.82 – 7.77)    | 3.50 – 18.1   | 0.344  | 0.016  |
| SM (OH) C22:1                                             | 11.9 (9.99 – 15.9)    | 3.40 – 27.6   | -0.066 | 0.651  |
| SM (OH) C22:2                                             | 4.93 (4.25 – 5.75)    | 1.63 – 12.3   | 0.046  | 0.755  |
| SM (OH) C24:1                                             | 1.18 (0.840 – 1.36)   | 0.257 – 2.32  | -0.043 | 0.770  |
| SM C16:0                                                  | 146 (119 – 193)       | 78.4 – 264    | 0.285  | 0.047  |
| SM C16:1                                                  | 9.38 (7.04 – 10.5)    | 5.06 – 15.0   | 0.231  | 0.111  |
| SM C18:0                                                  | 34.7 (27.5 – 54.1)    | 15.1 – 96.6   | 0.554  | <0.001 |
| SM C18:1                                                  | 7.11 (6.04 – 9.30)    | 3.61 – 12.5   | 0.401  | 0.004  |
| SM C20:2                                                  | 0.309 (0.271 – 0.41)  | 0.154 – 0.570 | 0.038  | 0.795  |
| SM C22:3                                                  | 0.724 (0.406 – 1.05)  | 0.204 – 4.48  | -0.234 | 0.106  |
| SM C24:0                                                  | 14.5 (11.4 – 17.8)    | 6.09 – 25.0   | 0.098  | 0.502  |
| SM C24:1                                                  | 34.6 (28.1 – 48.1)    | 16.7 – 65.7   | 0.259  | 0.073  |
| SM C26:0                                                  | 0.205 (0.177 – 0.290) | 0.062 – 0.990 | -0.009 | 0.953  |
| SM C26:1                                                  | 0.422 (0.359 – 0.590) | 0.184 – 1.09  | 0.105  | 0.473  |
| <b>Lyso-phosphatidylcholines (choline lyso-lecithins)</b> |                       |               |        |        |
| lysoPC a C16:0                                            | 76.7 (59.3 – 83.8)    | 34.0 – 129    | 0.058  | 0.691  |
| lysoPC a C16:1                                            | 2.10 (1.54 – 2.63)    | 0.891 – 4.59  | -0.266 | 0.065  |

|                                                        |                       |               |        |       |
|--------------------------------------------------------|-----------------------|---------------|--------|-------|
| lysoPC a C17:0                                         | 1.81 (1.61 – 2.15)    | 0.878 – 5.00  | -0.119 | 0.417 |
| lysoPC a C18:0                                         | 85.6 (65.4 – 108)     | 36.8 – 172    | 0.050  | 0.733 |
| lysoPC a C18:1                                         | 26.8 (21.6 – 32.8)    | 8.93 – 72.7   | -0.103 | 0.479 |
| lysoPC a C18:2                                         | 37.2 (25.5 – 56.5)    | 8.14 – 83.3   | -0.267 | 0.064 |
| lysoPC a C20:3                                         | 1.11 (0.858 – 1.55)   | 0.364 – 3.87  | -0.261 | 0.071 |
| lysoPC a C20:4                                         | 8.83 (6.90 – 12.5)    | 2.15 – 31.9   | -0.180 | 0.216 |
| lysoPC a C24:0                                         | 0.271 (0.197 – 0.400) | 0.125 – 1.13  | -0.114 | 0.434 |
| lysoPC a C26:0                                         | 0.144 (0.126 – 0.250) | 0.076 – 1.10  | -0.067 | 0.647 |
| lysoPC a C26:1                                         | 0.090 (0.074 – 0.150) | 0.050 – 0.880 | -0.013 | 0.930 |
| lysoPC a C28:0                                         | 0.353 (0.292 – 0.490) | 0.179 – 1.94  | -0.047 | 0.747 |
| lysoPC a C28:1                                         | 0.440 (0.343 – 0.510) | 0.200 – 1.53  | -0.202 | 0.164 |
| <b>Diacyl-phosphatidylcholines (choline lecithins)</b> |                       |               |        |       |
| PC aa C24:0                                            | 0.128 (0.097 – 0.220) | 0.050 – 1.26  | -0.028 | 0.850 |
| PC aa C28:1                                            | 2.15 (1.76 – 2.56)    | 0.905 – 4.92  | -0.051 | 0.728 |
| PC aa C30:0                                            | 4.64 (3.44 – 6.11)    | 2.31 – 8.60   | 0.202  | 0.164 |
| PC aa C30:2                                            | 0.065 (0.05 – 0.07)   | 0.036 – 0.10  | 0.271  | 0.060 |
| PC aa C32:0                                            | 11.5 (9.35 – 13.2)    | 5.68 – 21.9   | 0.058  | 0.692 |

|             |                       |               |        |        |
|-------------|-----------------------|---------------|--------|--------|
| PC aa C32:1 | 9.70 (8.37 – 14.2)    | 4.74 – 25.4   | 0.480  | <0.001 |
| PC aa C32:2 | 1.74 (1.54 – 2.26)    | 0.994 – 2.83  | 0.298  | 0.038  |
| PC aa C32:3 | 0.325 (0.259 – 0.400) | 0.149 – 0.740 | 0.057  | 0.699  |
| PC aa C34:1 | 154 (123 – 223)       | 79 – 312      | 0.347  | 0.014  |
| PC aa C34:2 | 331 (245 – 427)       | 158 – 607     | 0.140  | 0.338  |
| PC aa C34:3 | 15.4 (11.4 – 19.9)    | 5.72 – 32.8   | -0.106 | 0.469  |
| PC aa C34:4 | 0.763 (0.591 – 1.00)  | 0.346 – 2.01  | -0.137 | 0.348  |
| PC aa C36:0 | 4.24 (3.29 – 5.67)    | 2.02 – 9.09   | 0.172  | 0.238  |
| PC aa C36:1 | 122 (95 – 161)        | 61 – 229      | 0.179  | 0.219  |
| PC aa C36:2 | 472 (410 – 574)       | 261 – 808     | 0.005  | 0.974  |
| PC aa C36:3 | 113 (80.8 – 146)      | 48.9 – 249    | 0.024  | 0.871  |
| PC aa C36:4 | 146 (114 – 178)       | 78.1 – 348    | 0.086  | 0.557  |
| PC aa C36:5 | 15.9 (9.64 – 25.2)    | 4.51 – 106    | -0.248 | 0.085  |
| PC aa C36:6 | 0.874 (0.632 – 1.07)  | 0.365 – 3.01  | -0.058 | 0.694  |
| PC aa C38:0 | 2.18 (1.83 – 3.34)    | 1.02 – 5.07   | -0.060 | 0.681  |
| PC aa C38:1 | 0.665 (0.539 – 0.770) | 0.328 – 1.03  | 0.024  | 0.869  |
| PC aa C38:3 | 63.3 (51.3 – 79.7)    | 32.8 – 158    | -0.077 | 0.597  |

|                                                               |                       |               |        |       |
|---------------------------------------------------------------|-----------------------|---------------|--------|-------|
| PC aa C38:4                                                   | 358 (264 – 464)       | 154 – 764     | 0.012  | 0.935 |
| PC aa C38:5                                                   | 87.9 (65.7 – 113)     | 41.8 – 275    | -0.094 | 0.519 |
| PC aa C38:6                                                   | 101 (67.2 – 141)      | 22 – 301      | 0.176  | 0.227 |
| PC aa C40:2                                                   | 0.644 (0.516 – 0.93)  | 0.335 – 4.45  | -0.004 | 0.979 |
| PC aa C40:3                                                   | 0.891 (0.757 – 1.19)  | 0.542 – 3.07  | -0.046 | 0.754 |
| PC aa C40:4                                                   | 7.55 (5.98 – 10.6)    | 3.02 – 20.3   | 0.015  | 0.917 |
| PC aa C40:5                                                   | 27.6 (20.3 – 43.7)    | 11.5 – 65.8   | 0.145  | 0.319 |
| PC aa C40:6                                                   | 111 (69.5 – 171)      | 26.5 – 324    | 0.171  | 0.240 |
| PC aa C42:0                                                   | 0.228 (0.190 – 0.300) | 0.113 – 1.58  | 0.061  | 0.675 |
| PC aa C42:1                                                   | 0.176 (0.150 – 0.210) | 0.086 – 0.930 | 0.010  | 0.947 |
| PC aa C42:2                                                   | 0.254 (0.199 – 0.330) | 0.113 – 0.830 | -0.191 | 0.188 |
| PC aa C42:4                                                   | 0.308 (0.238 – 0.460) | 0.131 – 2.33  | -0.038 | 0.796 |
| PC aa C42:5                                                   | 0.401 (0.287 – 0.540) | 0.203 – 1.02  | -0.156 | 0.285 |
| PC aa C42:6                                                   | 0.652 (0.461 – 0.740) | 0.338 – 1.41  | -0.218 | 0.132 |
| <b>Acyl-alkyl-phosphatidylcholines (choline plasmalogens)</b> |                       |               |        |       |
| PC ae C30:0                                                   | 0.329 (0.279 – 0.400) | 0.164 – 0.700 | -0.166 | 0.254 |
| PC ae C30:1                                                   | 0.401 (0.325 – 0.480) | 0.182 – 1.38  | 0.036  | 0.807 |

|             |                       |               |        |       |
|-------------|-----------------------|---------------|--------|-------|
| PC ae C30:2 | 0.136 (0.103 – 0.17)  | 0.056 – 0.46  | -0.064 | 0.663 |
| PC ae C32:1 | 2.54 (2.23 – 3.11)    | 1.60 – 6.22   | 0.232  | 0.108 |
| PC ae C32:2 | 0.460 (0.384 – 0.530) | 0.234 – 0.950 | 0.079  | 0.588 |
| PC ae C34:0 | 1.53 (1.19 – 1.84)    | 0.718 – 10.1  | 0.059  | 0.689 |
| PC ae C34:1 | 9.83 (7.96 – 11.5)    | 4.61 – 18.5   | -0.069 | 0.640 |
| PC ae C34:2 | 8.47 (6.76 – 10.0)    | 3.34 – 15.2   | -0.247 | 0.087 |
| PC ae C34:3 | 2.16 (1.78 – 2.73)    | 0.740 – 6.97  | -0.136 | 0.352 |
| PC ae C36:0 | 0.902 (0.660 – 1.17)  | 0.361 – 4.67  | 0.067  | 0.649 |
| PC ae C36:1 | 9.33 (7.34 – 10.8)    | 4.04 – 22.6   | 0.080  | 0.587 |
| PC ae C36:2 | 16.7 (13.8 – 19.5)    | 7.11 – 33.7   | -0.118 | 0.418 |
| PC ae C36:3 | 4.96 (4.04 – 5.67)    | 2.24 – 7.88   | -0.154 | 0.291 |
| PC ae C36:4 | 6.51 (4.82 – 8.25)    | 2.86 – 11.7   | -0.030 | 0.837 |
| PC ae C36:5 | 3.68 (2.49 – 4.56)    | 1.23 – 10.4   | -0.010 | 0.948 |
| PC ae C38:0 | 2.72 (2.17 – 3.72)    | 1.39 – 9.17   | -0.202 | 0.165 |
| PC ae C38:1 | 3.29 (2.40 – 3.95)    | 1.42 – 8.07   | -0.055 | 0.706 |
| PC ae C38:2 | 4.66 (3.67 – 5.97)    | 2.25 – 11.7   | -0.233 | 0.108 |
| PC ae C38:3 | 5.21 (4.20 – 6.07)    | 3.10 – 12.0   | -0.053 | 0.715 |

|                                      |                       |              |        |       |
|--------------------------------------|-----------------------|--------------|--------|-------|
| PC ae C38:4                          | 13.2 (11.1 – 16.6)    | 7.04 – 35.9  | 0.044  | 0.766 |
| PC ae C38:5                          | 11.1 (8.4 – 13.4)     | 4.97 – 20.5  | -0.002 | 0.991 |
| PC ae C38:6                          | 4.97 (3.51 – 5.95)    | 1.88 – 9.09  | -0.121 | 0.409 |
| PC ae C40:1                          | 1.61 (1.35 – 2.08)    | 0.819 – 3.28 | 0.031  | 0.833 |
| PC ae C40:2                          | 1.37 (1.15 – 1.81)    | 0.601 – 4.78 | -0.083 | 0.571 |
| PC ae C40:3                          | 3.54 (2.08 – 5.66)    | 0.901 – 29.9 | -0.071 | 0.628 |
| PC ae C40:4                          | 5.30 (4.25 – 7.80)    | 2.60 – 16.8  | -0.101 | 0.491 |
| PC ae C40:5                          | 5.09 (4.06 – 6.77)    | 2.35 – 18.5  | 0.107  | 0.464 |
| PC ae C40:6                          | 4.19 (3.21 – 6.43)    | 1.92 – 7.83  | 0.154  | 0.291 |
| PC ae C42:1                          | 1.02 (0.761 – 1.16)   | 0.407 – 4.47 | -0.135 | 0.354 |
| PC ae C42:2                          | 0.515 (0.412 – 0.640) | 0.246 – 2.90 | -0.093 | 0.526 |
| PC ae C42:3                          | 0.647 (0.557 – 1.07)  | 0.327 – 2.23 | 0.029  | 0.841 |
| PC ae C42:4                          | 0.603 (0.446 – 0.840) | 0.227 – 4.25 | -0.043 | 0.768 |
| PC ae C44:3                          | 0.193 (0.135 – 0.260) | 0.089 – 1.15 | -0.022 | 0.879 |
| PC ae C44:5                          | 0.157 (0.134 – 0.190) | 0.101 – 0.32 | -0.054 | 0.711 |
| PC ae C44:6                          | 0.204 (0.173 – 0.250) | 0.118 – 0.54 | -0.017 | 0.908 |
| <b>Diglycerides (diacyglycerols)</b> |                       |              |        |       |

|                                         |                       |              |        |       |
|-----------------------------------------|-----------------------|--------------|--------|-------|
| DG(16:0_18:2)                           | 1.41 (0.860 – 2.31)   | 0.444 – 7.93 | 0.395  | 0.005 |
| DG(17:0_18:1)                           | 0.655 (0.529 – 0.800) | 0.295 – 1.89 | 0.069  | 0.635 |
| DG(18:1_18:1)                           | 1.18 (0.667 – 2.13)   | 0.227 – 9.71 | 0.298  | 0.038 |
| DG(18:1_18:2)                           | 4.30 (2.93 – 7.97)    | 1.40 – 27.2  | 0.301  | 0.035 |
| DG(18:2_18:2)                           | 4.41 (2.46 – 7.79)    | 0.878 – 26.3 | 0.284  | 0.048 |
| <b>Triglycerides (triacylglycerols)</b> |                       |              |        |       |
| TG(14:0_34:2)                           | 1.75 (0.683 – 4.07)   | 0.221 – 15.4 | -0.084 | 0.565 |
| TG(14:0_36:2)                           | 3.39 (1.38 – 6.39)    | 0.613 – 53.7 | -0.053 | 0.715 |
| TG(14:0_36:3)                           | 4.56 (1.83 – 7.69)    | 0.792 – 52.6 | -0.104 | 0.477 |
| TG(14:0_36:4)                           | 1.75 (0.817 – 2.98)   | 0.243 – 16.8 | -0.106 | 0.466 |
| TG(14:0_38:5)                           | 0.173 (0.11 – 0.27)   | 0.042 – 1.17 | -0.072 | 0.625 |
| TG(16:0_32:1)                           | 3.93 (1.26 – 12.5)    | 0.140 – 72.0 | -0.101 | 0.490 |
| TG(16:0_32:2)                           | 2.65 (0.934 – 5.61)   | 0.425 – 22.8 | -0.065 | 0.657 |
| TG(16:0_34:0)                           | 6.60 (2.11 – 15.6)    | 0.544 – 103  | 0.059  | 0.688 |
| TG(16:0_34:1)                           | 38.4 (9.26 – 64.1)    | 3.15 – 419   | 0.060  | 0.681 |
| TG(16:0_34:2)                           | 34.4 (12.0 – 62.6)    | 4.41 – 330   | 0.034  | 0.817 |
| TG(16:0_34:3)                           | 7.75 (3.90 – 17.7)    | 0.751 – 74.3 | -0.092 | 0.531 |

|               |                      |              |        |       |
|---------------|----------------------|--------------|--------|-------|
| TG(16:0_34:4) | 0.844 (0.436 – 1.82) | 0.128 – 5.76 | -0.165 | 0.258 |
| TG(16:0_35:2) | 1.61 (0.730 – 2.88)  | 0.254 – 16.8 | 0.046  | 0.754 |
| TG(16:0_35:3) | 0.788 (0.414 – 1.24) | 0.167 – 7.32 | 0.008  | 0.954 |
| TG(16:0_36:2) | 78.5 (35.6 – 138)    | 11.2 – 995   | 0.136  | 0.352 |
| TG(16:0_36:3) | 109 (58.5 – 202)     | 15.6 – 1101  | 0.109  | 0.456 |
| TG(16:0_36:4) | 48.4 (27.0 – 87.6)   | 7.14 – 434   | 0.049  | 0.736 |
| TG(16:0_36:5) | 4.93 (2.60 – 10.1)   | 0.672 – 35.0 | -0.095 | 0.516 |
| TG(16:0_37:3) | 0.641 (0.311 – 1.12) | 0.165 – 3.86 | 0.055  | 0.708 |
| TG(16:0_38:1) | 0.651 (0.277 – 1.07) | 0.122 – 6.12 | -0.021 | 0.884 |
| TG(16:0_38:2) | 1.62 (0.789 – 2.41)  | 0.281 – 19.4 | 0.002  | 0.988 |
| TG(16:0_38:3) | 1.94 (1.11 – 3.17)   | 0.520 – 34.3 | 0.091  | 0.533 |
| TG(16:0_38:4) | 2.34 (1.33 – 3.77)   | 0.488 – 31.9 | 0.137  | 0.346 |
| TG(16:0_38:5) | 3.14 (1.96 – 6.53)   | 0.612 – 25.8 | 0.097  | 0.507 |
| TG(16:0_38:6) | 2.92 (2.06 – 6.29)   | 0.360 – 27.3 | -0.006 | 0.970 |
| TG(16:0_40:6) | 2.05 (1.46 – 5.15)   | 0.461 – 30.3 | 0.088  | 0.549 |
| TG(16:0_40:7) | 2.49 (1.64 – 5.28)   | 0.206 – 44.0 | 0.149  | 0.306 |
| TG(16:1_34:0) | 1.79 (0.617 – 3.40)  | 0.334 – 23.2 | -0.088 | 0.547 |

|               |                       |              |        |       |
|---------------|-----------------------|--------------|--------|-------|
| TG(16:1_34:1) | 8.38 (3.37 – 15.3)    | 1.06 – 100   | -0.119 | 0.417 |
| TG(16:1_34:2) | 6.94 (3.58 – 14.9)    | 0.909 – 87.9 | -0.110 | 0.452 |
| TG(16:1_34:3) | 1.41 (0.671 – 2.97)   | 0.173 – 14.1 | -0.232 | 0.109 |
| TG(16:1_36:1) | 3.65 (1.11 – 4.60)    | 0.425 – 66.5 | -0.054 | 0.713 |
| TG(16:1_36:2) | 11.4 (4.81 – 16.3)    | 1.72 – 208   | -0.114 | 0.435 |
| TG(16:1_36:3) | 12.7 (6.49 – 23.6)    | 2.93 – 212   | -0.141 | 0.332 |
| TG(16:1_36:4) | 5.16 (2.81 – 11.5)    | 0.922 – 58.4 | -0.183 | 0.209 |
| TG(16:1_36:5) | 0.678 (0.318 – 1.28)  | 0.091 – 5.42 | -0.266 | 0.065 |
| TG(16:1_38:3) | 0.461 (0.259 – 0.780) | 0.148 – 9.99 | -0.084 | 0.566 |
| TG(16:1_38:4) | 0.577 (0.336 – 0.880) | 0.143 – 9.33 | -0.108 | 0.460 |
| TG(16:1_38:5) | 0.582 (0.433 – 0.780) | 0.160 – 5.00 | -0.114 | 0.436 |
| TG(17:0_34:2) | 1.16 (0.598 – 2.00)   | 0.231 – 11.3 | 0.071  | 0.629 |
| TG(17:0_36:3) | 2.74 (1.54 – 5.06)    | 0.496 – 36.1 | 0.092  | 0.528 |
| TG(17:0_36:4) | 1.25 (0.705 – 2.07)   | 0.285 – 12.0 | 0.045  | 0.758 |
| TG(17:1_34:1) | 0.886 (0.465 – 1.65)  | 0.232 – 10.6 | 0.028  | 0.846 |
| TG(17:1_34:2) | 0.768 (0.438 – 1.32)  | 0.126 – 8.22 | -0.021 | 0.887 |
| TG(17:1_36:3) | 0.972 (0.570 – 1.83)  | 0.169 – 18.5 | -0.024 | 0.871 |

|               |                       |               |        |       |
|---------------|-----------------------|---------------|--------|-------|
| TG(17:1_36:4) | 0.449 (0.320 – 0.890) | 0.084 – 5.70  | -0.030 | 0.839 |
| TG(17:1_38:5) | 0.143 (0.096 – 0.210) | 0.022 – 1.13  | 0.057  | 0.697 |
| TG(17:1_38:6) | 0.136 (0.084 – 0.200) | 0.029 – 0.950 | 0.095  | 0.515 |
| TG(17:2_34:2) | 0.235 (0.116 – 0.310) | 0.060 – 1.11  | -0.107 | 0.465 |
| TG(17:2_36:2) | 0.278 (0.165 – 0.470) | 0.078 – 3.37  | 0.008  | 0.958 |
| TG(17:2_36:3) | 0.244 (0.155 – 0.390) | 0.047 – 2.33  | 0.000  | 0.999 |
| TG(17:2_36:4) | 0.191 (0.126 – 0.300) | 0.065 – 1.88  | 0.106  | 0.467 |
| TG(18:0_32:1) | 1.49 (0.437 – 3.73)   | 0.118 – 22.0  | -0.046 | 0.751 |
| TG(18:0_32:2) | 0.849 (0.308 – 1.59)  | 0.106 – 8.20  | -0.049 | 0.736 |
| TG(18:0_34:2) | 11.9 (4.14 – 19.4)    | 1.39 – 166    | 0.062  | 0.670 |
| TG(18:0_34:3) | 2.29 (0.896 – 4.00)   | 0.453 – 39.9  | -0.074 | 0.613 |
| TG(18:0_36:3) | 21.1 (11.3 – 41.6)    | 2.33 – 631    | 0.100  | 0.494 |
| TG(18:0_36:4) | 10.3 (5.59 – 22.0)    | 1.44 – 216    | 0.076  | 0.603 |
| TG(18:0_36:5) | 1.30 (0.584 – 2.29)   | 0.212 – 14.4  | -0.043 | 0.769 |
| TG(18:0_38:6) | 1.52 (1.14 – 2.71)    | 0.182 – 16.3  | 0.069  | 0.636 |
| TG(18:0_38:7) | 0.505 (0.309 – 0.750) | 0.074 – 2.58  | -0.110 | 0.453 |
| TG(18:1_30:0) | 2.09 (0.798 – 6.49)   | 0.210 – 35.1  | -0.083 | 0.569 |

|               |                       |              |        |       |
|---------------|-----------------------|--------------|--------|-------|
| TG(18:1_32:0) | 18.5 (5.92 – 36.9)    | 1.45 – 246   | 0.052  | 0.725 |
| TG(18:1_32:1) | 12.4 (5.40 – 26.3)    | 1.57 – 171   | -0.112 | 0.444 |
| TG(18:1_32:2) | 6.76 (2.26 – 11.0)    | 0.937 – 68.3 | -0.122 | 0.404 |
| TG(18:1_32:3) | 0.902 (0.374 – 2.00)  | 0.140 – 7.36 | -0.132 | 0.367 |
| TG(18:1_33:0) | 1.09 (0.488 – 2.41)   | 0.198 – 11.9 | 0.080  | 0.583 |
| TG(18:1_33:1) | 2.54 (1.30 – 5.10)    | 0.409 – 27.6 | -0.003 | 0.983 |
| TG(18:1_33:2) | 1.49 (0.843 – 2.67)   | 0.449 – 14.9 | -0.038 | 0.793 |
| TG(18:1_33:3) | 0.303 (0.150 – 0.510) | 0.074 – 2.08 | -0.079 | 0.589 |
| TG(18:1_34:1) | 135 (58.6 – 218)      | 16.2 – 1461  | 0.128  | 0.381 |
| TG(18:1_34:2) | 119 (54.5 – 202)      | 16.6 – 1221  | 0.092  | 0.528 |
| TG(18:1_34:3) | 15.7 (8.700 – 33.9)   | 3.10 – 241   | -0.102 | 0.484 |
| TG(18:1_34:4) | 1.67 (0.740 – 3.42)   | 0.345 – 14.9 | -0.157 | 0.28  |
| TG(18:1_35:2) | 3.67 (1.92 – 6.59)    | 0.575 – 62.2 | 0.065  | 0.656 |
| TG(18:1_35:3) | 1.15 (0.601 – 2.08)   | 0.234 – 20.3 | -0.030 | 0.837 |
| TG(18:1_36:1) | 32.5 (12.8 – 51.9)    | 1.34 – 1023  | 0.135  | 0.355 |
| TG(18:1_36:2) | 80.1 (39.0 – 171)     | 9.24 – 1927  | 0.081  | 0.581 |
| TG(18:1_36:3) | 83.4 (39.7 – 203)     | 13.2 – 1838  | 0.066  | 0.653 |

|               |                     |              |        |       |
|---------------|---------------------|--------------|--------|-------|
| TG(18:1_36:4) | 34.0 (20.4 – 86.3)  | 5.28 – 768   | 0.020  | 0.892 |
| TG(18:1_36:5) | 5.20 (2.99 – 12.2)  | 0.755 – 62.0 | -0.088 | 0.547 |
| TG(18:1_36:6) | 0.67 (0.366 – 1.44) | 0.094 – 4.18 | -0.180 | 0.216 |
| TG(18:1_38:5) | 5.96 (3.52 – 9.33)  | 1.10 – 78.3  | 0.153  | 0.293 |
| TG(18:1_38:6) | 4.85 (2.90 – 7.57)  | 0.477 – 48.0 | 0.117  | 0.425 |
| TG(18:2_30:0) | 1.94 (0.699 – 4.44) | 0.334 – 17.6 | -0.064 | 0.661 |
| TG(18:2_30:1) | 1.37 (0.51 – 3.28)  | 0.237 – 9.87 | -0.134 | 0.359 |
| TG(18:2_32:0) | 12.5 (5.36 – 26.1)  | 1.42 – 136   | 0.044  | 0.765 |
| TG(18:2_32:1) | 10.2 (4.44 – 18.6)  | 1.23 – 100   | -0.108 | 0.460 |
| TG(18:2_32:2) | 3.98 (1.63 – 6.89)  | 0.705 – 35.2 | -0.137 | 0.347 |
| TG(18:2_33:0) | 1.02 (0.502 – 1.77) | 0.155 – 9.14 | 0.053  | 0.717 |
| TG(18:2_33:1) | 1.89 (0.926 – 3.25) | 0.404 – 17.3 | -0.017 | 0.906 |
| TG(18:2_33:2) | 1.10 (0.674 – 2.25) | 0.344 – 12.5 | -0.072 | 0.623 |
| TG(18:2_34:0) | 19.2 (8.53 – 32.7)  | 3.00 – 216   | 0.086  | 0.555 |
| TG(18:2_34:1) | 104 (51.1 – 183)    | 14.0 – 1028  | 0.102  | 0.487 |
| TG(18:2_34:2) | 80.2 (44.1 – 154)   | 12.5 – 709   | 0.031  | 0.832 |
| TG(18:2_34:3) | 9.58 (5.68 – 23.9)  | 1.63 – 105   | -0.135 | 0.354 |

|               |                      |              |        |       |
|---------------|----------------------|--------------|--------|-------|
| TG(18:2_34:4) | 1.18 (0.507 – 2.23)  | 0.148 – 7.37 | -0.199 | 0.170 |
| TG(18:2_35:1) | 3.25 (1.69 – 5.92)   | 0.718 – 43.6 | 0.092  | 0.532 |
| TG(18:2_35:2) | 2.32 (1.34 – 3.92)   | 0.517 – 30.4 | 0.027  | 0.855 |
| TG(18:2_35:3) | 0.710 (0.446 – 1.42) | 0.143 – 9.66 | -0.062 | 0.674 |
| TG(18:2_36:0) | 3.77 (1.50 – 6.33)   | 0.288 – 93.1 | 0.089  | 0.542 |
| TG(18:2_36:1) | 23.3 (13.8 – 47.4)   | 3.20 – 704   | 0.083  | 0.570 |
| TG(18:2_36:2) | 54.1 (27 – 121)      | 8.79 – 1411  | 0.079  | 0.587 |
| TG(18:2_36:3) | 50.1 (27.3 – 132)    | 6.91 – 1131  | 0.037  | 0.800 |
| TG(18:2_36:4) | 19.4 (10.3 – 41.8)   | 2.24 – 321   | 0.005  | 0.974 |
| TG(18:2_36:5) | 3.72 (2.07 – 8.45)   | 0.349 – 41.6 | -0.147 | 0.313 |
| TG(18:2_38:4) | 2.81 (1.94 – 5.15)   | 0.670 – 53.9 | 0.083  | 0.571 |
| TG(18:2_38:5) | 4.45 (2.81 – 8.17)   | 0.736 – 41.2 | 0.108  | 0.461 |
| TG(18:2_38:6) | 3.23 (2.24 – 5.82)   | 0.294 – 45.4 | 0.083  | 0.569 |
| TG(18:3_34:0) | 1.62 (0.612 – 2.49)  | 0.333 – 11.9 | -0.060 | 0.681 |
| TG(18:3_34:1) | 8.59 (3.68 – 15.8)   | 1.27 – 61.5  | -0.052 | 0.723 |
| TG(18:3_34:2) | 5.54 (3.04 – 11.8)   | 0.825 – 40.6 | -0.133 | 0.364 |
| TG(18:3_34:3) | 1.00 (0.434 – 1.84)  | 0.099 – 7.13 | -0.250 | 0.083 |

|               |                       |               |        |       |
|---------------|-----------------------|---------------|--------|-------|
| TG(18:3_35:2) | 0.291 (0.153 – 0.450) | 0.079 – 1.94  | -0.134 | 0.360 |
| TG(18:3_36:1) | 1.92 (0.90 – 4.25)    | 0.319 – 37.4  | -0.012 | 0.937 |
| TG(18:3_36:2) | 5.98 (3.11 – 12.6)    | 0.871 – 99.9  | -0.055 | 0.708 |
| TG(18:3_36:3) | 4.92 (2.52 – 11.4)    | 0.672 – 60.1  | -0.142 | 0.332 |
| TG(18:3_36:4) | 1.89 (1.01 – 4.89)    | 0.243 – 21.6  | -0.167 | 0.250 |
| TG(18:3_38:5) | 0.527 (0.293 – 0.67)  | 0.101 – 2.15  | -0.064 | 0.661 |
| TG(18:3_38:6) | 0.393 (0.262 – 0.55)  | 0.047 – 1.46  | -0.205 | 0.157 |
| TG(20:0_32:3) | 0.297 (0.163 – 0.520) | 0.061 – 3.11  | 0.091  | 0.533 |
| TG(20:0_32:4) | 0.434 (0.215 – 0.720) | 0.076 – 3.55  | 0.110  | 0.450 |
| TG(20:1_32:2) | 0.390 (0.293 – 0.510) | 0.082 – 1.54  | 0.052  | 0.721 |
| TG(20:1_32:3) | 0.118 (0.079 – 0.190) | 0.037 – 0.890 | -0.013 | 0.931 |
| TG(20:1_34:1) | 1.31 (0.650 – 2.32)   | 0.123 – 18.7  | 0.062  | 0.673 |
| TG(20:1_34:2) | 1.20 (0.639 – 1.99)   | 0.269 – 17.5  | 0.022  | 0.880 |
| TG(20:1_34:3) | 0.290 (0.177 – 0.520) | 0.048 – 5.53  | -0.063 | 0.669 |
| TG(20:2_32:1) | 0.304 (0.142 – 0.550) | 0.074 – 3.57  | -0.018 | 0.903 |
| TG(20:2_34:1) | 1.25 (0.606 – 1.93)   | 0.222 – 25.0  | 0.115  | 0.431 |
| TG(20:2_34:2) | 1.10 (0.684 – 2.02)   | 0.203 – 21.8  | 0.092  | 0.527 |

|               |                       |               |        |       |
|---------------|-----------------------|---------------|--------|-------|
| TG(20:2_34:3) | 0.316 (0.197 – 0.680) | 0.071 – 6.30  | -0.081 | 0.579 |
| TG(20:2_36:5) | 0.119 (0.071 – 0.190) | 0.032 – 1.23  | 0.000  | 0.998 |
| TG(20:3_32:0) | 0.331 (0.177 – 0.580) | 0.058 – 2.61  | 0.073  | 0.618 |
| TG(20:3_32:1) | 0.303 (0.172 – 0.440) | 0.071 – 1.91  | -0.044 | 0.764 |
| TG(20:3_34:1) | 1.75 (1.01 – 3.16)    | 0.485 – 16.1  | 0.100  | 0.492 |
| TG(20:3_34:2) | 1.66 (0.996 – 2.77)   | 0.495 – 13.4  | 0.036  | 0.807 |
| TG(20:3_34:3) | 0.367 (0.213 – 0.600) | 0.129 – 2.80  | -0.132 | 0.364 |
| TG(20:3_36:3) | 2.14 (1.09 – 3.24)    | 0.434 – 29.4  | 0.120  | 0.410 |
| TG(20:3_36:4) | 0.994 (0.521 – 1.61)  | 0.227 – 9.64  | 0.046  | 0.756 |
| TG(20:3_36:5) | 0.182 (0.130 – 0.290) | 0.042 – 0.770 | -0.125 | 0.392 |
| TG(20:4_32:1) | 0.805 (0.554 – 1.29)  | 0.171 – 6.90  | -0.021 | 0.886 |
| TG(20:4_32:2) | 0.398 (0.301 – 0.730) | 0.123 – 3.32  | -0.051 | 0.727 |
| TG(20:4_33:2) | 0.128 (0.086 – 0.220) | 0.030 – 1.62  | 0.093  | 0.527 |
| TG(20:4_34:0) | 1.77 (0.976 – 3.66)   | 0.183 – 17.5  | 0.184  | 0.207 |
| TG(20:4_34:1) | 7.16 (4.52 – 16.4)    | 1.12 – 52.7   | 0.135  | 0.354 |
| TG(20:4_34:2) | 6.89 (4.62 – 13.2)    | 1.02 – 56.1   | 0.102  | 0.486 |
| TG(20:4_34:3) | 1.14 (0.847 – 1.93)   | 0.223 – 7.04  | -0.087 | 0.552 |

|               |                       |               |        |       |
|---------------|-----------------------|---------------|--------|-------|
| TG(20:4_35:3) | 0.130 (0.081 – 0.190) | 0.030 – 0.790 | 0.074  | 0.611 |
| TG(20:4_36:2) | 10.1 (5.55 – 15.5)    | 1.15 – 98.7   | 0.182  | 0.211 |
| TG(20:4_36:3) | 11.1 (4.82 – 15.0)    | 1.11 – 80.8   | 0.140  | 0.338 |
| TG(20:4_36:4) | 3.87 (2.12 – 6.41)    | 0.378 – 34.4  | 0.088  | 0.546 |
| TG(20:4_36:5) | 0.798 (0.542 – 1.26)  | 0.105 – 3.75  | -0.054 | 0.712 |
| TG(20:5_34:0) | 0.828 (0.407 – 1.38)  | 0.070 – 9.48  | -0.175 | 0.229 |
| TG(20:5_34:1) | 2.96 (1.64 – 6.41)    | 0.251 – 29.1  | -0.227 | 0.118 |
| TG(20:5_34:2) | 2.81 (1.93 – 7.04)    | 0.193 – 25.4  | -0.251 | 0.082 |
| TG(20:5_36:2) | 3.47 (1.65 – 6.78)    | 0.188 – 29.5  | -0.137 | 0.348 |
| TG(20:5_36:3) | 3.99 (2.12 – 7.63)    | 0.202 – 28.9  | -0.180 | 0.216 |
| TG(22:2_32:4) | 0.127 (0.084 – 0.300) | 0.027 – 1.99  | 0.036  | 0.805 |
| TG(22:4_34:2) | 0.918 (0.634 – 1.97)  | 0.215 – 13.4  | 0.098  | 0.503 |
| TG(22:5_32:1) | 0.358 (0.195 – 0.600) | 0.099 – 3.43  | -0.031 | 0.833 |
| TG(22:5_34:1) | 3.05 (2.12 – 6.77)    | 0.434 – 40.3  | 0.081  | 0.580 |
| TG(22:5_34:2) | 2.80 (1.95 – 6.23)    | 0.404 – 33.7  | 0.080  | 0.587 |
| TG(22:5_34:3) | 0.491 (0.289 – 0.740) | 0.106 – 3.77  | -0.097 | 0.508 |
| TG(22:6_32:0) | 1.07 (0.534 – 2.12)   | 0.094 – 31.4  | 0.164  | 0.260 |

|                                               |                      |              |        |        |
|-----------------------------------------------|----------------------|--------------|--------|--------|
| TG(22:6_32:1)                                 | 0.654 (0.36 – 1.34)  | 0.078 – 7.34 | 0.038  | 0.795  |
| TG(22:6_34:1)                                 | 6.09 (3.13 – 11.1)   | 0.310 – 141  | 0.217  | 0.134  |
| TG(22:6_34:2)                                 | 6.47 (3.44 – 11.1)   | 0.236 – 157  | 0.185  | 0.203  |
| TG(22:6_34:3)                                 | 0.784 (0.457 – 1.29) | 0.073 – 9.89 | -0.001 | 0.994  |
| <b>OTHERS</b>                                 |                      |              |        |        |
| <b>Vitamins and cofactors</b>                 |                      |              |        |        |
| Choline                                       | 14.0 (10.6 – 16.4)   | 5.48 – 40.6  | 0.004  | 0.981  |
| <b>Amine oxide</b>                            |                      |              |        |        |
| Trimethylamine N-oxide                        | 8.87 (3.55 – 20.2)   | 0.846 – 66.8 | 0.489  | <0.001 |
| <b>Alkaloids</b>                              |                      |              |        |        |
| Trigonelline                                  | 1.19 (0.626 – 1.91)  | 0.091 – 9.11 | -0.009 | 0.953  |
| <b>Metabolites of purine nucleotide bases</b> |                      |              |        |        |
| Hypoxanthine                                  | 8.94 (5.49 – 12.8)   | 0.963 – 31.5 | -0.014 | 0.926  |
| <b>Carboxylic acids</b>                       |                      |              |        |        |
| Aconitic acid                                 | 11.5 (7.72 – 15.2)   | 2.40 – 33.2  | 0.090  | 0.540  |
| Lactic acid                                   | 4244 (3176 – 6792)   | 1505 – 15536 | 0.046  | 0.753  |
