# Supplementary material for: Correlation between metabolomic profile constituents and feline pancreatic lipase immunoreactivity
Source: PubMed Central journal article supplement — J Vet Intern Med. 2022 Jan 13;36(2):473–81. doi: 10.1111/jvim.16349 (PMC8965226; doi:10.1111/jvim.16349), 2022-01-13
Supplement: JVIM-36-473-s002.pdf [file JVIM-36-473-s002.pdf]

**Table S5. Mutual correlations between five sphingolipids significantly correlated with fPLI in the univariable analysis and between potential confounders**

|                    | Creatinine | SDMA              | ALT               | Glucose           | HexCer<br>(d18:1/18:0) | HexCer<br>(d18:1/20:0) | HexCer<br>(d18:1/24:0) | HexCer<br>(d18:1/24:1) | SM C18:0          |
|--------------------|------------|-------------------|-------------------|-------------------|------------------------|------------------------|------------------------|------------------------|-------------------|
| Creatinine         |            | 0.569<br>(<0.001) | -0.019<br>(0.899) | -0.094<br>(0.521) | -0.025<br>(0.867)      | -0.099<br>(0.499)      | -0.073<br>(0.618)      | -0.019<br>(0.899)      | -0.022<br>(0.881) |
| SDMA               |            |                   | 0.232<br>(0.108)  | 0.027<br>(0.853)  | 0.458<br>(0.001)       | 0.348<br>(0.014)       | 0.334<br>(0.019)       | 0.415<br>(0.003)       | 0.428<br>(0.002)  |
| ALT                |            |                   |                   | 0.209<br>(0.149)  | 0.486<br>(<0.001)      | 0.566<br>(<0.001)      | 0.550<br>(<0.001)      | 0.529<br>(<0.001)      | 0.481<br>(0.001)  |
| Glucose            |            |                   |                   |                   | 0.402<br>(0.004)       | 0.412<br>(0.003)       | 0.443<br>(0.001)       | 0.411<br>(0.003)       | 0.528<br>(<0.001) |
| HexCer(d18:1/18:0) |            |                   |                   |                   |                        | 0.901<br>(<0.001)      | 0.864<br>(<0.001)      | 0.925<br>(<0.001)      | 0.898<br>(<0.001) |
| HexCer(d18:1/20:0) |            |                   |                   |                   |                        |                        | 0.912<br>(<0.001)      | 0.930<br>(<0.001)      | 0.844<br>(<0.001) |

|                    |  |  |  |  |  |  |  |  |                   |                   |
|--------------------|--|--|--|--|--|--|--|--|-------------------|-------------------|
| HexCer(d18:1/24:0) |  |  |  |  |  |  |  |  | 0.952<br>(<0.001) | 0.847<br>(<0.001) |
| HexCer(d18:1/24:1) |  |  |  |  |  |  |  |  |                   | 0.889<br>(<0.001) |

Presented as the Spearman's correlation coefficient ( $R_s$ ) and p-value in parentheses. ALT – alanine aminotransferase; fPLI – feline pancreatic lipase

immunoreactivity; HexCer – cerebroside; SM – sphingomyelin; SDMA – symmetric dimethylarginine
