# Supplementary material for: Correlation between metabolomic profile constituents and feline pancreatic lipase immunoreactivity
Source: PubMed Central journal article supplement — J Vet Intern Med. 2022 Jan 13;36(2):473–81. doi: 10.1111/jvim.16349 (PMC8965226; doi:10.1111/jvim.16349), 2022-01-13
Supplement: JVIM-36-473-s003.pdf [file JVIM-36-473-s003.pdf]

**Table S3. Normality of the distribution of numerical variables included in the multivariable analysis before and after Box-Cox transformation**

| Variable           | Raw data                         |             |             |             |              | Box-Cox transformed data          |             |             |             |             |
|--------------------|----------------------------------|-------------|-------------|-------------|--------------|-----------------------------------|-------------|-------------|-------------|-------------|
|                    | Shapiro-<br>Wilk test<br>p-value | Skewness    |             | Kurtosis    |              | Shapiro-<br>Wilk test p-<br>value | Skewness    |             | Kurtosis    |             |
|                    |                                  | Coefficient | CI 95%      | Coefficient | CI 95%       |                                   | Coefficient | CI 95%      | Coefficient | CI 95%      |
| fPLI               | <0.001*                          | 2.86*       | 2.20, 3.53  | 7.80*       | 6.49, 9.11   | 0.108                             | 0.13        | -0.54, 0.79 | -1.02       | -2.33, 0.29 |
| SDMA               | <0.001*                          | 3.70*       | 3.04, 4.37  | 15.25*      | 13.9, 16.6   | 0.378                             | -0.01       | -0.68, 0.66 | 0.31        | -1.00, 1.62 |
| ALT                | <0.001*                          | 2.19*       | 1.53, 2.86  | 5.15*       | 3.84, 6.45   | 0.523                             | 0.08        | -0.58, 0.75 | -0.81       | -2.12, 0.50 |
| Glucose            | <0.001*                          | 0.34        | -0.33, 1.00 | -1.46*      | -2.77, -0.15 | 0.006*                            | -0.13       | -0.80, 0.53 | -1.24       | -2.55, 0.07 |
| HexCer(d18:1/18:0) | <0.001*                          | 1.76*       | 1.09, 2.43  | 3.03*       | 1.72, 4.33   | 0.468                             | 0.06        | -0.61, 0.73 | -0.71       | -2.02, 0.60 |
| HexCer(d18:1/20:0) | <0.001*                          | 1.64*       | 0.98, 2.31  | 2.43*       | 1.12, 3.74   | 0.325                             | 0.06        | -0.60, 0.73 | -0.44       | -1.75, 0.87 |
| HexCer(d18:1/24:0) | <0.001*                          | 1.39*       | 0.72, 2.06  | 2.10*       | 0.80, 3.41   | 0.824                             | 0.04        | -0.63, 0.70 | -0.63       | -1.94, 0.68 |
| HexCer(d18:1/24:1) | <0.001*                          | 2.08*       | 1.42, 2.75  | 5.48*       | 4.18, 6.79   | 0.604                             | 0.07        | -0.60, 0.74 | -0.58       | -1.88, 0.73 |
| SM C18:0           | <0.001*                          | 1.08*       | 0.41, 1.75  | 0.52        | -0.78, 1.83  | 0.632                             | 0.03        | -0.64, 0.69 | -0.59       | -1.89, 0.72 |

ALT – alanine aminotransferase; CI 95% – 95% confidence interval; fPLI – feline pancreatic lipase immunoreactivity; HexCer – cerebroside; SM – sphingomyelin; SDMA – symmetric dimethylarginine

\* significant at  $\alpha=0.05$
