# Supplementary material for: Correlation between metabolomic profile constituents and feline pancreatic lipase immunoreactivity
Source: PubMed Central journal article supplement — J Vet Intern Med. 2022 Jan 13;36(2):473–81. doi: 10.1111/jvim.16349 (PMC8965226; doi:10.1111/jvim.16349), 2022-01-13
Supplement: JVIM-36-473-s005.pdf [file JVIM-36-473-s005.pdf]

**Table S2. Clinical characteristics of cats enrolled in the study**

| Diagnosis                                                                        | No. (%) of cats | Medical history and clinical presentation                                                                                                                                                                          | Laboratory and image diagnostic tests                                                                                                               |
|----------------------------------------------------------------------------------|-----------------|--------------------------------------------------------------------------------------------------------------------------------------------------------------------------------------------------------------------|-----------------------------------------------------------------------------------------------------------------------------------------------------|
| Healthy                                                                          | 11 (22.4)       | No clinical signs.                                                                                                                                                                                                 | Complete blood cell count and clinical chemistry within reference intervals.                                                                        |
| Diabetes mellitus (DM)                                                           | 9 (18.4)        | Ongoing glargine therapy and no clinical signs at presentation.<br><br>DM diagnosed at least 1 month before based on polyuria and polydipsia and glycosuria and fructosamine concentration > 400 $\mu\text{mol/L}$ | Complete blood cell count and clinical chemistry within reference intervals and fructosamine concentration < 450 $\mu\text{mol/L}$ at presentation. |
| Pancreatitis (FP)                                                                | 10 (20.4)       | Apathy and anorexia present from less than 3 days; vomiting (in 2 cats), diarrhea (in 1 cat).                                                                                                                      | fPLI >5.3 $\mu\text{g/L}$ .<br><br>No other diseases which could account for cats' condition.<br><br>Concurrent DM in 6 cats.                       |
| Acute kidney injury (AKI)                                                        | 5 (10.2)        | Apathy and anorexia; vomiting.                                                                                                                                                                                     | Creatinine >2.5 mg/dL.<br><br>Concurrent DM in 2 cats.<br><br>Concurrent FP (fPLI >5.3 $\mu\text{g/L}$ ) in 4 cats.                                 |
| Neoplastic disease: 2 liver tumors, 1 pancreatic tumor and 1 adrenal gland tumor | 4 (8.2)         | Apathy and anorexia; emaciation.                                                                                                                                                                                   | Histopathology from the exploratory surgery (2 cats) or autopsy (2 cats).                                                                           |

|                                         |         |                                                    |                                                                                                                                                                                                  |
|-----------------------------------------|---------|----------------------------------------------------|--------------------------------------------------------------------------------------------------------------------------------------------------------------------------------------------------|
|                                         |         |                                                    | <p>Concurrent AKI (creatinine = 8 mg/dL), DM, and FP (fPLI = 22.7 µg/L) in a cat with adrenal gland tumor.</p> <p>Concurrent DM in 1 cat with hepatic tumor and 1 cat with pancreatic tumor.</p> |
| Acute cholangiohepatitis                | 2 (4.1) | Apathy and anorexia; vomiting; jaundice (1 cat).   | <p>ALT &gt;200 and ALP &gt;300 (2 cats); total bilirubin &gt;1 mg/dL (in 1 cat).</p> <p>Ultrasonographic features of the liver inflammation (2 cats).</p>                                        |
| Undefined general infection             | 2 (4.1) | Apathy and anorexia; fever >39.5°C.                | <p>WBC &gt;19 G/L and fPLI &lt;5.3 µg/L</p> <p>No other diseases which could account for cat's condition.</p>                                                                                    |
| Immune-mediated hemolytic anemia (IMHA) | 1 (2.0) | Apathy and anorexia; jaundice.                     | <p>Severe anemia (Ht = 21%) and hyperbilirubinemia (21.3 mg/dL).</p> <p>AKI (creatinine = 3.4 mg/dL).</p> <p>FP (fPLI = 23.8 µg/L).</p>                                                          |
| Hyperthyroidism                         | 1 (2.0) | Anorexia, vomiting, diarrhea, emaciation.          | Total thyroxine concentration >65 nmol/L.                                                                                                                                                        |
| Aortic thromboembolism                  | 1 (2.0) | Shock, no pulse palpable on both femoral arteries. | <p>Increased CPK (59700 U/L) and LDH (2830 U/L).</p> <p>Hypertrophic cardiomyopathy in the echocardiography.</p>                                                                                 |
| High-rise syndrome (HRS)                | 1 (2.0) | Fall from the 5 <sup>th</sup> floor.               | Concurrent FP (fPLI = 6.8 µg/L; hemorrhagic pancreas in the autopsy).                                                                                                                            |

|                                     |         |                                                                                                  |                                                                                                                                                                                      |
|-------------------------------------|---------|--------------------------------------------------------------------------------------------------|--------------------------------------------------------------------------------------------------------------------------------------------------------------------------------------|
| Panleukopenia                       | 1 (2.0) | No anti-FPV vaccination in medical history; apathy and anorexia; vomiting, hemorrhagic diarrhea. | Leukopenia (WBC = 0.6 G/L), neutropenia (neutrophil count = 0.2 G/L), lymphopenia (lymphocyte count = 0.4 G/L).<br>Positive in-clinic FPV test.<br>Concurrent FP (fPLI = 14.8 µg/L). |
| Feline infectious peritonitis (FIP) | 1 (2.0) | Ascites. Thick, sticky, yellowish fluid obtained by the abdominocentesis.                        | High protein concentration in the abdominal fluid.<br>Positive RT-PCR for feline coronavirus in the fluid.                                                                           |
