# Supplementary material for: Correlation between metabolomic profile constituents and feline pancreatic lipase immunoreactivity
Source: PubMed Central journal article supplement — J Vet Intern Med. 2022 Jan 13;36(2):473–81. doi: 10.1111/jvim.16349 (PMC8965226; doi:10.1111/jvim.16349), 2022-01-13
Supplement: JVIM-36-473-s006.pdf [file JVIM-36-473-s006.pdf]

**Table S6. Multivariable linear regression investigating the relationship between selected sphingolipid metabolites and fPLI controlled for 3 potential confounders**

| Metabolite                | Standardized regression coefficient ( $\beta$ ) | Standard error (SE) | CI 95% for $\beta$ | t statistics | p-value |
|---------------------------|-------------------------------------------------|---------------------|--------------------|--------------|---------|
| <b>HexCer(d18:1/18:0)</b> |                                                 |                     |                    |              |         |
| SDMA                      | 0.230                                           | 0.149               | -0.071, 0.530      | 1.539        | 0.131   |
| ALT                       | 0.145                                           | 0.138               | -0.133, 0.424      | 1.051        | 0.299   |
| Glucose                   | 0.128                                           | 0.138               | -0.150, 0.407      | 0.929        | 0.358   |
| HexCer(d18:1/18:0)        | 0.303                                           | 0.175               | -0.049, 0.655      | 1.735        | 0.090   |
| <b>HexCer(d18:1/20:0)</b> |                                                 |                     |                    |              |         |
| SDMA                      | 0.254                                           | 0.137               | -0.022, 0.530      | 1.855        | 0.07    |
| ALT                       | 0.099                                           | 0.144               | -0.192, 0.389      | 0.684        | 0.498   |
| Glucose                   | 0.135                                           | 0.133               | -0.132, 0.403      | 1.021        | 0.313   |
| HexCer(d18:1/20:0)        | 0.334                                           | 0.167               | -0.003, 0.670      | 1.999        | 0.052   |
| <b>HexCer(d18:1/24:0)</b> |                                                 |                     |                    |              |         |
| SDMA                      | 0.247                                           | 0.129               | -0.013, 0.508      | 1.911        | 0.062   |
| ALT                       | 0.055                                           | 0.141               | -0.229, 0.340      | 0.392        | 0.697   |
| Glucose                   | 0.090                                           | 0.132               | -0.176, 0.356      | 0.679        | 0.501   |
| HexCer(d18:1/24:0)        | 0.424                                           | 0.163               | 0.096, 0.752       | 2.604        | 0.013   |
| <b>HexCer(d18:1/24:1)</b> |                                                 |                     |                    |              |         |
| SDMA                      | 0.215                                           | 0.138               | -0.063, 0.492      | 1.560        | 0.126   |
| ALT                       | 0.077                                           | 0.141               | -0.207, 0.360      | 0.545        | 0.588   |
| Glucose                   | 0.114                                           | 0.131               | -0.150, 0.377      | 0.870        | 0.389   |
| HexCer(d18:1/24:1)        | 0.403                                           | 0.166               | 0.067, 0.739       | 2.421        | 0.020   |
| <b>SM C18:0</b>           |                                                 |                     |                    |              |         |

|          |       |       |               |       |       |
|----------|-------|-------|---------------|-------|-------|
| SDMA     | 0.218 | 0.144 | -0.073, 0.509 | 1.508 | 0.139 |
| ALT      | 0.137 | 0.135 | -0.136, 0.409 | 1.010 | 0.318 |
| Glucose  | 0.068 | 0.147 | -0.228, 0.365 | 0.465 | 0.644 |
| SM C18:0 | 0.362 | 0.177 | 0.005, 0.720  | 2.044 | 0.047 |

ALT – alanine aminotransferase; CI 95% – 95% confidence interval; fPLI – feline pancreatic lipase immunoreactivity; HexCer – cerebroside; SM – sphingomyelin; SDMA – symmetric dimethylarginine
